# Supplementary material
Source: Research Square preprint supplement (doi:10.21203/rs.3.rs-9883854/v1)

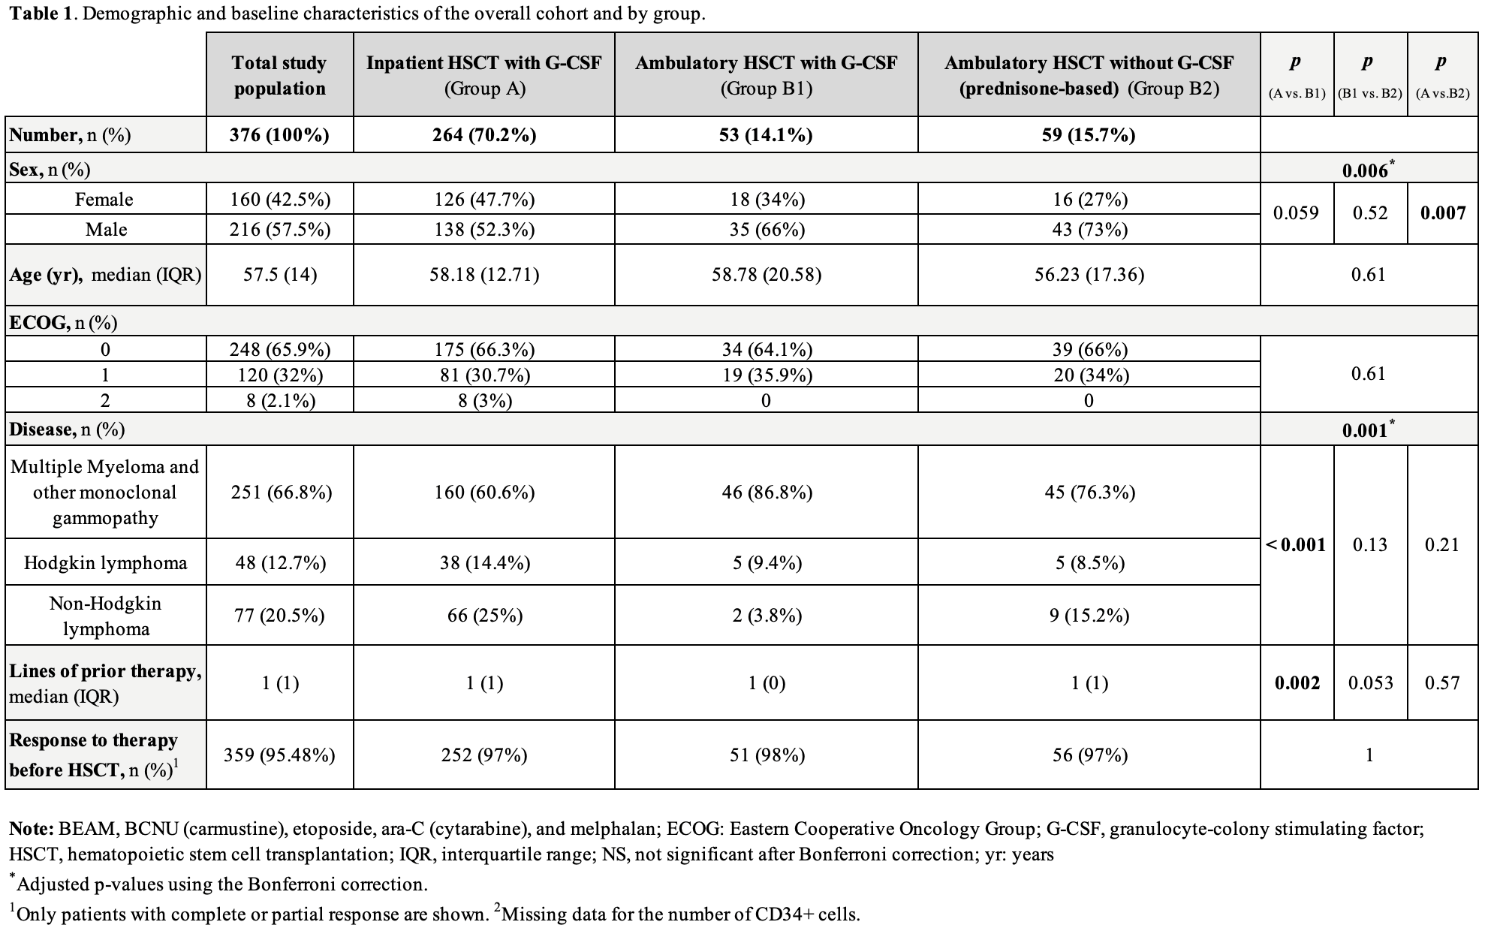


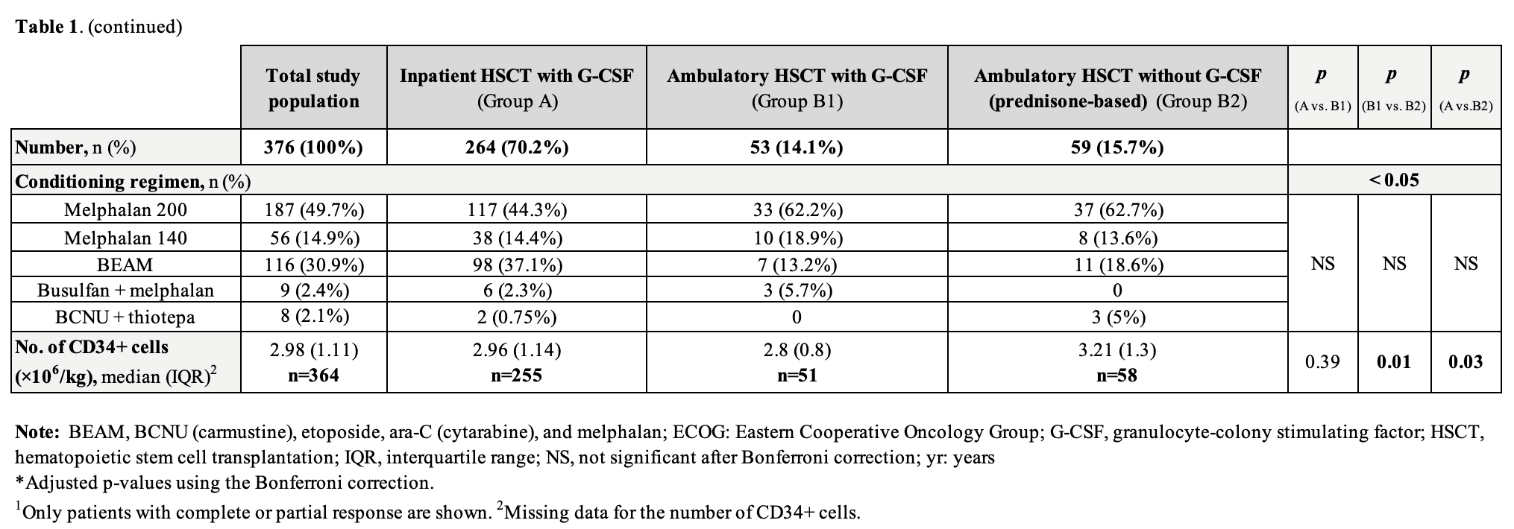


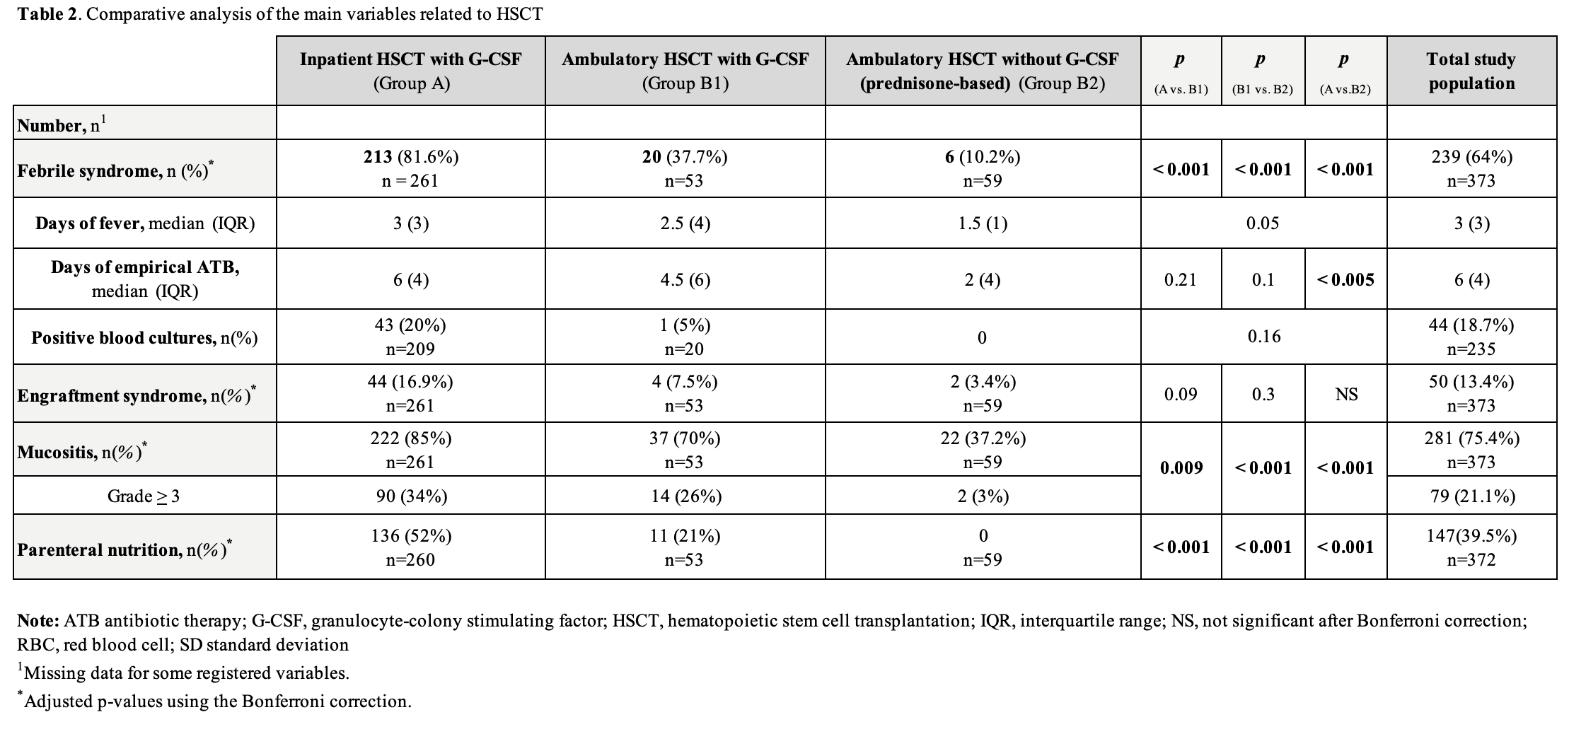


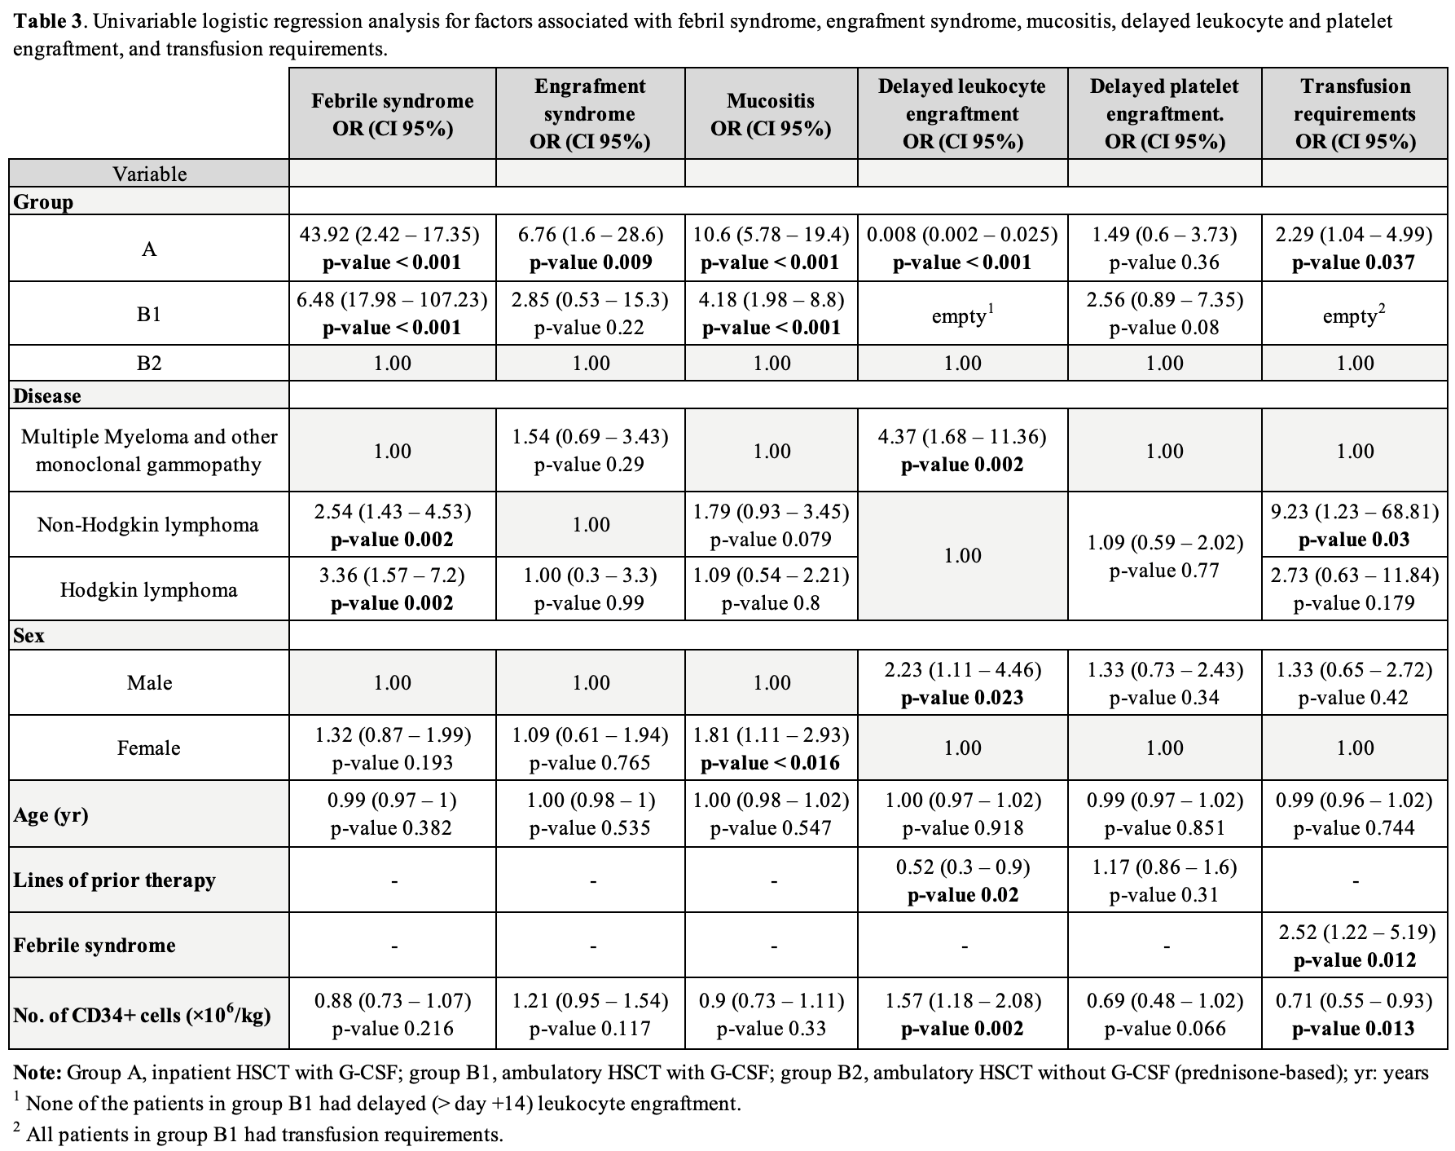

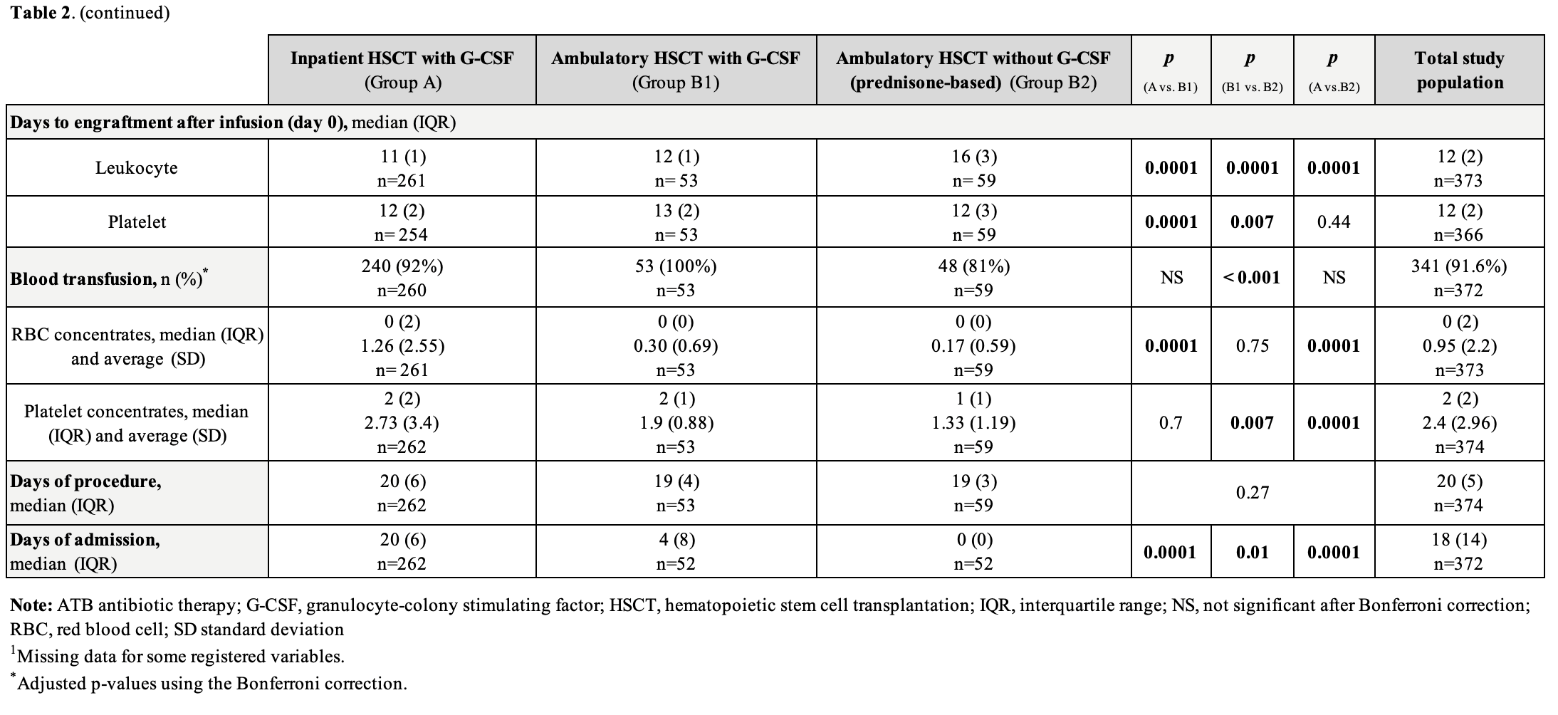


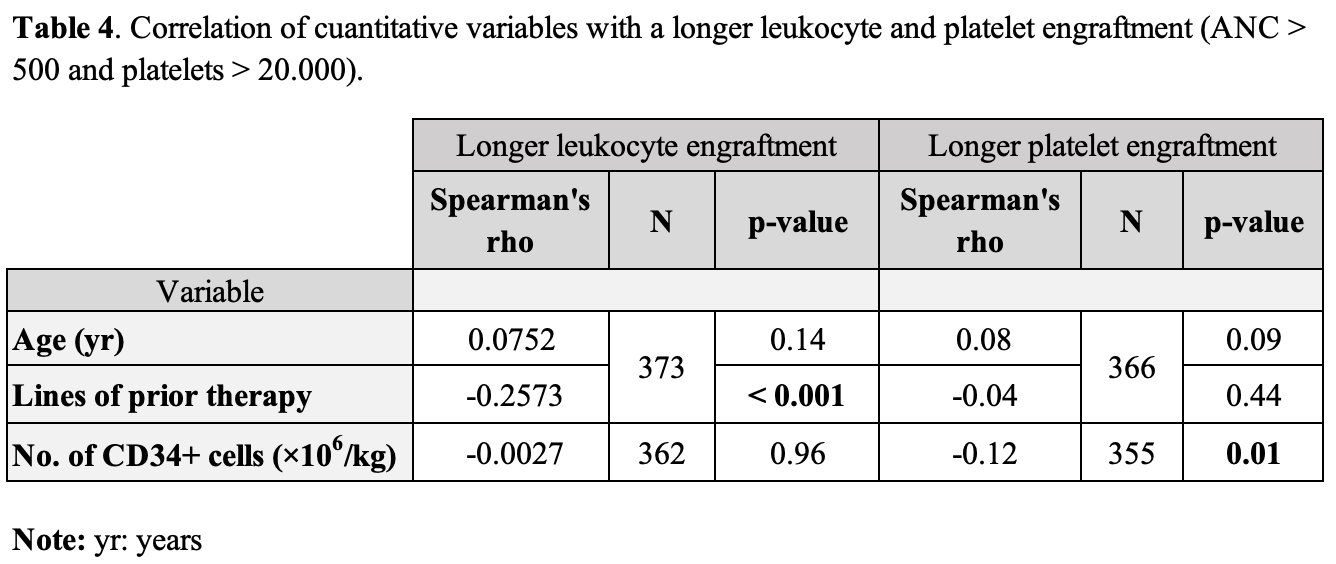


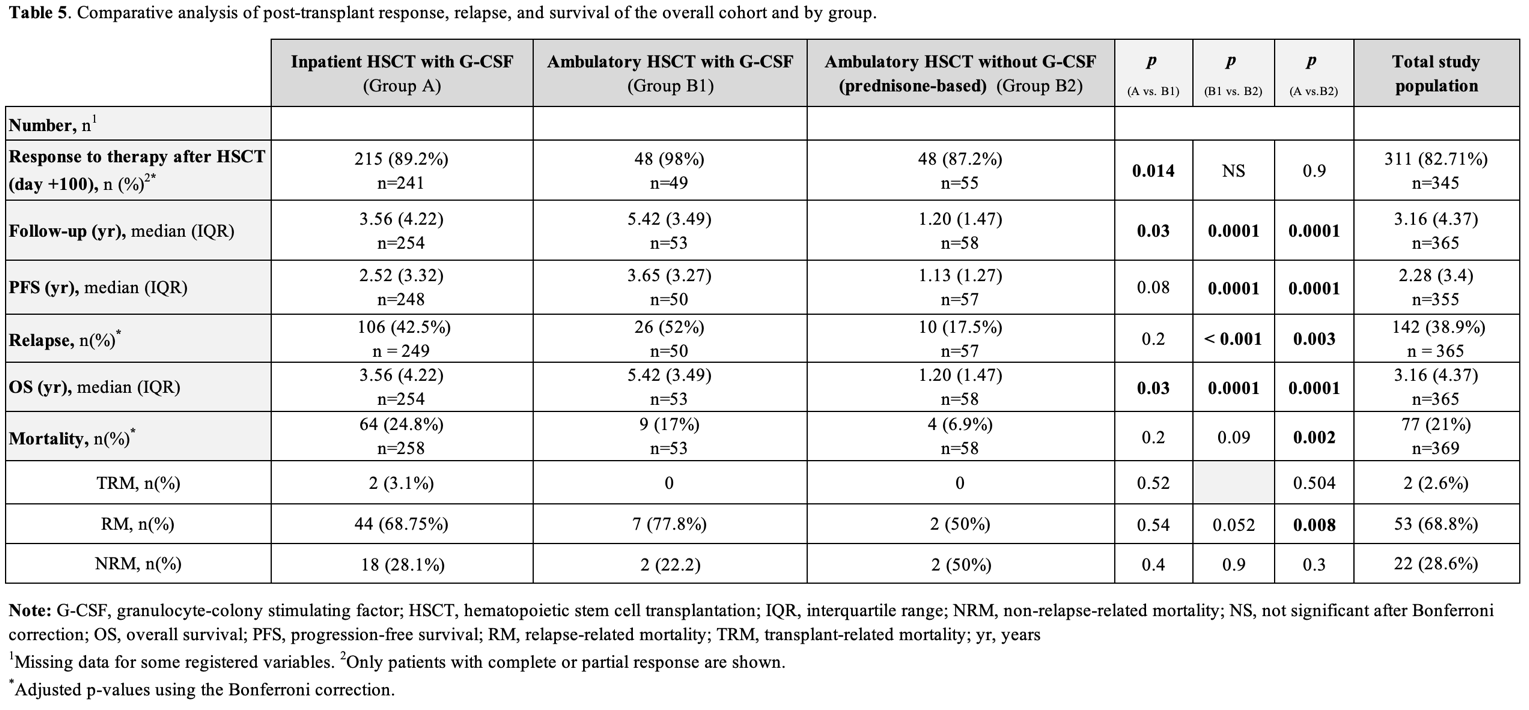

Supplement: Supplementary file 1 [file c4d88ee2c42ff6bbae867cc3.docx]
